# Supplementary material for: A Systematic Review of Therapeutic Process Factors in Mental Health Treatment for Autistic Youth
Source: Springer Nature journal article supplement (doi:10.1007/s10567-022-00409-0), 2022-08-24
Supplement: MOESM1 [file 23398428]

Supplemental Table 1. Search strategy

| Database | Search strategy                                                                                                                                                                                                                                                                                                                                                                                                                                                                                                                                                                                                                                                                                                                                                                                                                                                                                                                                                                                                                                                                                                                                                                                                                                                                                                                                                                                                                                                                                                         |
|----------|-------------------------------------------------------------------------------------------------------------------------------------------------------------------------------------------------------------------------------------------------------------------------------------------------------------------------------------------------------------------------------------------------------------------------------------------------------------------------------------------------------------------------------------------------------------------------------------------------------------------------------------------------------------------------------------------------------------------------------------------------------------------------------------------------------------------------------------------------------------------------------------------------------------------------------------------------------------------------------------------------------------------------------------------------------------------------------------------------------------------------------------------------------------------------------------------------------------------------------------------------------------------------------------------------------------------------------------------------------------------------------------------------------------------------------------------------------------------------------------------------------------------------|
| MEDLINE  | <ol style="list-style-type: none"> <li>1. Autistic Disorder/</li> <li>2. Autism Spectrum Disorder/</li> <li>3. Asperger Syndrome/</li> <li>4. 1 or 2 or 3</li> <li>5. Child/</li> <li>6. Adolescent/</li> <li>7. Pediatrics/</li> <li>8. 5 or 6 or 7</li> <li>9. Therapeutic Alliance/</li> <li>10. Empathy/</li> <li>11. goals/</li> <li>12. collaboration.mp.</li> <li>13. resistance.mp.</li> <li>14. therap* relationship.mp.</li> <li>15. positive regard.mp.</li> <li>16. congruence.mp.</li> <li>17. therap* rupture.mp.</li> <li>18. impasses.mp.</li> <li>19. therapy repair.mp.</li> <li>20. Self Disclosure/</li> <li>21. Countertransference/</li> <li>22. relational interpretation.mp.</li> <li>23. Motivation/</li> <li>24. Patient Preference/</li> <li>25. Assimilation.mp.</li> <li>26. attachment.mp.</li> <li>27. engagement.mp.</li> <li>28. treatment induction.mp.</li> <li>29. openness.mp.</li> <li>30. bond.mp.</li> <li>31. comfort.mp.</li> <li>32. Cooperative Behavior/</li> <li>33. treatment difficulty.mp.</li> <li>34. treatment involvement.mp.</li> <li>35. willingness.mp.</li> <li>36. Patient Participation/</li> <li>37. treatment transaction.mp.</li> <li>38. warmth.mp.</li> <li>39. Trust/</li> <li>40. therap* process.mp.</li> <li>41. 9 or 10 or 11 or 12 or 13 or 14 or 15 or 16 or 17 or 18 or 19 or 20 or 21 or 22 or 23 or 24 or 25 or 26 or 27 or 28 or 29 or 30 or 31 or 32 or 33 or 34 or 35 or 36 or 37 or 38 or 39 or 40</li> <li>42. 4 and 8 and 41</li> </ol> |

PsycINFO (child\* OR mainsubject(Pediatrics) OR noft(youth) OR noft(adolescen\*) OR noft(kid)) AND mainsubject(Autism Spectrum Disorders) AND ((mainsubject(Therapeutic Alliance) OR mainsubject(Empathy) OR mainsubject(Goals) OR mainsubject(Collaboration) OR mainsubject(Resistance) OR mainsubject(Psychotherapeutic Resistance) OR mainsubject(Self-Disclosure) OR mainsubject(Countertransference) OR mainsubject(Expectations) OR mainsubject(Preferences)) OR (mainsubject(Assimilation (Cognitive Process)) OR mainsubject(Attachment Behavior) OR mainsubject(Openness to Experience) OR mainsubject(Bonding (Emotional)) OR mainsubject(Cooperation) OR mainsubject(Involvement) OR mainsubject(Participation) OR mainsubject(Trust) OR mainsubject(Therapeutic Processes) OR mainsubject(Treatment Process AND Outcome Measures)) OR (noft(therap\* relationship) OR noft(positive regard) OR noft(congruence) OR noft(rupture) OR noft(impasses) OR noft(repair) OR noft(relational interpretation) OR noft(treatment induction) OR noft(comfort) OR noft(treatment difficulty)) OR (noft(willingness) OR noft(treatment transaction) OR noft(warmth)))

PubMed (((autism spectrum disorder[MeSH Terms]) OR (autistic disorder[MeSH Terms]) OR (asperger syndrome[MeSH Terms])) AND (("child"[MeSH Terms]) OR (pediatrics[MeSH Terms]) OR (adolescent[MeSH Terms]))) AND (((("therapeutic alliance"[MeSH Terms]) OR (empathy[MeSH Terms]) OR (goals[MeSH Terms]) OR ("self disclosure"[MeSH Terms]) OR (countertransference[MeSH Terms]) OR (motivation[MeSH Terms]) OR ("patient preference"[MeSH Terms]) OR ("object attachment"[MeSH Terms]) OR ("patient comfort"[MeSH Terms]) OR ("patient compliance"[MeSH Terms]) OR ("patient participation"[MeSH Terms]) OR (trust[MeSH Terms]) OR ("psychotherapeutic processes"[MeSH Terms]) OR (process assessment health care[MeSH Terms]) OR (collaboration[Title/Abstract]) OR (resistance[Title/Abstract]) OR ("therapy relationship"[Title/Abstract]) OR ("positive regard"[Title/Abstract]) OR (congruence[Title/Abstract]) OR ("rupture"[Title/Abstract]) OR (impasses[Title/Abstract]) OR ("repair"[Title/Abstract]) OR ("relational interpretation"[Title/Abstract]) OR (assimilation[Title/Abstract]) OR (engagement[Title/Abstract]) OR ("treatment induction"[Title/Abstract]) OR (openness[Title/Abstract]) OR (bond[Title/Abstract]) OR ("treatment difficulty"[Title/Abstract]) OR ("treatment involvement"[Title/Abstract]) OR (willingness[Title/Abstract]) OR (warmth[Title/Abstract])))
